# Supplementary material for: The Bright Side and Dark Side of Workplace Social Capital: Opposing Effects of Gender on Overweight among Japanese Employees
Source: PLoS One. 2014 Jan 31;9(1):e88084. doi: 10.1371/journal.pone.0088084 (PMC3909277; doi:10.1371/journal.pone.0088084)
Supplement: Table S1 — 8 items used to measure workplace social capital. (PDF) [file pone.0088084.s001.pdf]

**Table S1.** 8 items used to measure workplace social capital

| Items                                                                                                     | Bonding/bridging/linking |
|-----------------------------------------------------------------------------------------------------------|--------------------------|
| 1. Our supervisor treats us with kindness and consideration.                                              | Linking                  |
| 2. Our supervisor shows concern for our rights as an employee.                                            | Linking                  |
| 3. We have a 'we are together' attitude.                                                                  | Bonding                  |
| 4. People keep each other informed about work-related issues in the work unit.                            | Bonding                  |
| 5. People feel understood and accepted by each other.                                                     | Bonding                  |
| 6. Do members of the work unit build on each other's ideas in order to achieve the best possible outcome? | Bridging                 |
| 7. People in the work unit cooperate in order to help develop and apply new ideas.                        | Bridging                 |
| 8. We can trust our supervisor.                                                                           | Linking                  |

The responses were given in a 5-point Likert-scale (1="totally disagree", 5="totally agree"), except for the seventh item in which the categories were: 1="very little", 5="very much".
